# Supplementary material for: Application of Whole Exome and Targeted Panel Sequencing in the Clinical Molecular Diagnosis of 319 Chinese Families with Inherited Retinal Dystrophy and Comparison Study
Source: MDPI journal article supplement (doi:10.3390/genes9070360), 2018-07-19
Supplement: s1 [file s1]

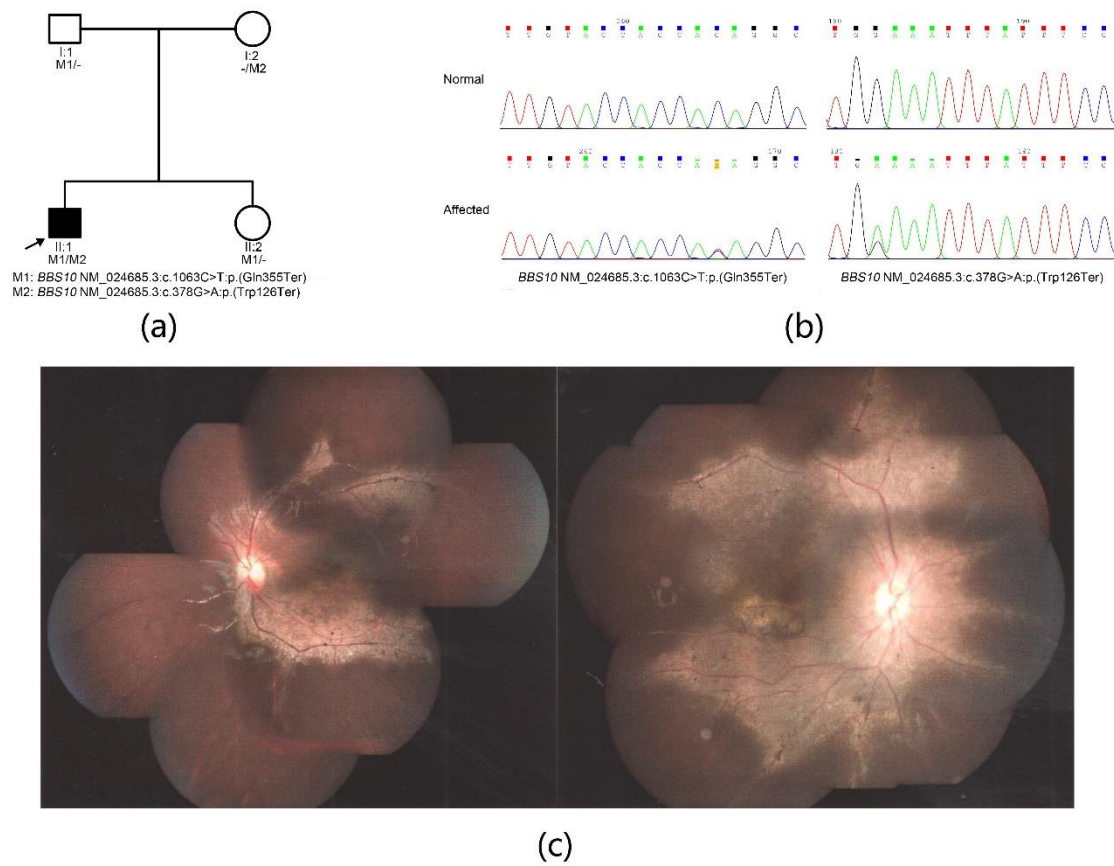

**Figure S1.** Clinical phenotype and pathogenic mutations of *BBS10* identified in patient 2016090902. (a) The pedigree of the family. Arrow indicated the patient 2016090902; (b) Representative sequence chromatograms for the proband and his parents; (c) Fundus examinations of the proband showed widespread retinal atrophy in the posterior pole.
