# Supplementary material for: Application of Whole Exome and Targeted Panel Sequencing in the Clinical Molecular Diagnosis of 319 Chinese Families with Inherited Retinal Dystrophy and Comparison Study
Source: Genes (Basel). 2018 Jul 19;9(7):360. doi: 10.3390/genes9070360 (PMC6071067; doi:10.3390/genes9070360)
Supplement: Supplementary file 1 [file genes-09-00360-s001.zip]

Archive with 6 entries (6 files):
- FigureS1.pdf
- FigureS2.pdf
- TableS1.xlsx
- TableS2.xlsx
- TableS3.xlsx
- TableS4.xlsx
