# Supplementary material for: Application of Whole Exome and Targeted Panel Sequencing in the Clinical Molecular Diagnosis of 319 Chinese Families with Inherited Retinal Dystrophy and Comparison Study
Source: Genes (Basel). 2018 Jul 19;9(7):360. doi: 10.3390/genes9070360 (PMC6071067; doi:10.3390/genes9070360)
Supplement: Supplementary file 1 [file genes-09-00360-s001.zip › TableS1.xlsx]

## Sheet: Sheet1
Table S1. Clinical data and pathogenic mutations are listed for 94 probands with
hereditary eye disease enrichment panel.
Family ID	Gender	Initial Diagnosis	Inheritance	Gene	Genotype	Exon Number	HGVS_transcript_variant	HGVS_predicted_protein_consequence	HGVS_genomic_variant	Reference	Classification	Chr	Start	End	Ref	Alt	ExAC_ALL	ExAC_EAS	gnomAD_exome_ALL	gnomAD_exome_EAS	PopFreqMax
2016060102	male	RP	AD	RHO	Heterozygous	E5	NM_000539.3:c.1034T>C	NP_000530.1:p.(Val345Ala)	NC_000003.11:g.129252548T>C	Novel	likely pathogenic	chr3	129252548	129252548	T	C	NA	NA	NA	NA	NA
2016060103	male	CORD	AD	PRPH2	Heterozygous	E2	NM_000322.4:c.658C>T	NP_000313.2:p.(Arg220Trp)	NC_000006.11:g.42672273G>A	Becirovic E et al., 2016	pathogenic	chr6	42672273	42672273	G	A	NA	NA	NA	NA	NA
2016062801	female	RP	AD	PRPF8	Heterozygous	E43	NM_006445.3:c.6928A>G	NP_006436.3:p.(Arg2310Gly)	NC_000017.10:g.1554176T>C	McKie AB et al., 2001	pathogenic	chr17	1554176	1554176	T	C	NA	NA	NA	NA	NA
2016081601	female	RP	AD	PRPF31	Heterozygous	E4	NM_015629.3:c.320T>C	NP_056444.3:p.(Leu107Pro)	NC_000019.9:g.54625320T>C	Novel	likely pathogenic	chr19	54625320	54625320	T	C	NA	NA	NA	NA	NA
2016090901	female	RP?	AD	RHO	Heterozygous	E2	NM_000539.3:c.403C>T	NP_000530.1:p.(Arg135Trp)	NC_000003.11:g.129249760C>T	Bunge S et al., 1993	pathogenic	chr3	129249760	129249760	C	T	NA	NA	NA	NA	NA
2016092101	male	RP?	AD	RHO	Heterozygous	E1	NM_000539.3:c.36del	NP_000530.1:p.(Phe13SerfsTer35)	NC_000003.11:g.129247612del	Novel	pathogenic	chr3	129247610	129247610	C	-	NA	NA	4.061e-06	5.798e-05	NA
2016092102	male	RP?	AD	RHO	Heterozygous	E4	NM_000539.3:c.851G>A	NP_000530.1:p.(Gly284Asp)	NC_000003.11:g.129251530G>A	Novel	likely pathogenic	chr3	129251530	129251530	G	A	NA	NA	NA	NA	NA
2016102415	female	RP	AD	IMPDH1	Heterozygous	E10	NM_000883.3:c.931G>A	NP_000874.2:p.(Asp311Asn)	NC_000007.13:g.128038611C>T	Bowne SJ et al., 2002	pathogenic	chr7	128038611	128038611	C	T	8.317e-06	0	4.065e-06	0	0
2016102429	female	RP	AD	SNRNP200	Heterozygous	E22	NM_014014.4:c.2941-2A>G	NP_054733.2:p.?	NC_000002.11:g.96955119T>C	Novel	pathogenic	chr2	96955119	96955119	T	C	NA	NA	NA	NA	NA
2016111405	male	RP	AD	RP1	Heterozygous	E4	NM_006269.1:c.2029C>T	NP_006260.1:p.(Arg677Ter)	NC_000008.10:g.55538471C>T	Pierce EA et al., 1999	pathogenic	chr8	55538471	55538471	C	T	NA	NA	NA	NA	NA
2016111412	male	LCA	AD	PRPF31	Heterozygous	E10	NM_015629.3:c.1060C>T	NP_056444.3:p.(Arg354Ter)	NC_000019.9:g.54631562C>T	Sullivan LS et al., 2013	pathogenic	chr19	54631562	54631562	C	T	NA	NA	NA	NA	NA
2016111421	female	CORD	AD	PRPF8	Heterozygous	E43	NM_006445.3:c.6938A>G	NP_006436.3:p.(His2313Arg)	NC_000017.10:g.1554166T>C	Novel	likely pathogenic	chr17	1554166	1554166	T	C	NA	NA	NA	NA	NA
2016120503	female	RP	AD	PRPF31	Heterozygous	E8	NM_015629.3:c.785T>C	NP_056444.3:p.(Phe262Ser)	NC_000019.9:g.54627965T>C	Novel	likely pathogenic	chr19	54627965	54627965	T	C	NA	NA	NA	NA	NA
2016120510	female	RP	AD	CRX	Heterozygous	E4	NM_000554.5:c.509del	NP_000545.1:p.(Pro170LeufsTer17)	NC_000019.9:g.48342833del	Novel	pathogenic	chr19	48342830	48342830	C	-	NA	NA	NA	NA	NA
2016121203	female	RP	AD	RHO	Heterozygous	E5	NM_000539.3:c.1040C>T	NP_000530.1:p.(Pro347Leu)	NC_000003.11:g.129252554C>T	Dryja TP et al., 1990	pathogenic	chr3	129252554	129252554	C	T	8.263e-06	0	0	0	0.0001
2016121206	female	RP	AD	PROM1	Heterozygous	E12	NM_006017.2:c.1414C>T	NP_006008.1:p.(Arg472Ter)	NC_000004.11:g.16008201G>A	Novel	pathogenic	chr4	16008201	16008201	G	A	5.185e-05	0	1.774e-05	0	0.0001
2016121222	male	LCA	AD	IMPDH1	Heterozygous	E10	NM_000883.3:c.984G>C	NP_000874.2:p.(Gln328His)	NC_000007.13:g.128038558C>G	Novel	likely pathogenic	chr7	128038558	128038558	C	G	NA	NA	NA	NA	NA
2016121220	male	RP	AD	RHO	Heterozygous	E1	NM_000539.3:c.50C>T	NP_000530.1:p.(Thr17Met)	NC_000003.11:g.129247626C>T	Sheffield VC et al., 1991	pathogenic	chr3	129247626	129247626	C	T	NA	NA	NA	NA	NA
2016060104	male	RP	AR	CRB1	Homozygous	E6	NM_201253.2:c.1841G>A	NP_957705.1:p.(Gly614Asp)	NC_000001.10:g.197390799G>A	Novel	likely pathogenic	chr1	197390799	197390799	G	A	NA	NA	NA	NA	NA
2016060107	female	CORD	AR	ABCA4	Homozygous	E39	NM_000350.2:c.5512C>T	NP_000341.2:p.(His1838Tyr)	NC_000001.10:g.94476890G>A	Lewis RA et al., 1999	pathogenic	chr1	94476890	94476890	G	A	NA	NA	NA	NA	NA
2016060108	female	RP	AR	PDE6B	Compound heterozygous	E1	NM_000283.3:c.220C>T	NP_000274.2:p.(Arg74Cys)	NC_000004.11:g.619635C>T	van Huet RA et al., 2015	pathogenic	chr4	619635	619635	C	T	0.0006	0.0001	0.0005	0.0003	0.001
						E3	NM_000283.3:c.698C>T	NP_000274.2:p.(Thr233Met)	NC_000004.11:g.629745C>T	Novel	likely pathogenic	chr4	629745	629745	C	T	1.65e-05	0.0001	3.25e-05	0.0002	0.0001
2016060109	female	Usher	AR	USH2A	Compound heterozygous	E43	NM_206933.2:c.8559-2A>G	NP_996816.2:p.?	NC_000001.10:g.216051224T>C	Dai H et al., 2008	pathogenic	chr1	216051224	216051224	T	C	2.473e-05	0.0003	3.253e-05	0.0005	0.001
						E21	NM_206933.2:c.4616C>T	NP_996816.2:p.(Thr1539Ile)	NC_000001.10:g.216348605G>A	Novel	likely pathogenic	chr1	216348605	216348605	G	A	7.571e-05	0.0011	6.117e-05	0.0009	0.0011
2016060110	male	RP	AR	CRB1	Compound heterozygous	E6	NM_201253.2:c.1724C>T	NP_957705.1:p.(Ala575Val)	NC_000001.10:g.197390682C>T	Novel	likely pathogenic	chr1	197390682	197390682	C	T	NA	NA	4.067e-06	0	NA
						E10	NM_201253.2:c.3862G>A	NP_957705.1:p.(Gly1288Ser)	NC_000001.10:g.197407789G>A	Rong W et al., 2014	pathogenic	chr1	197407789	197407789	G	A	NA	NA	NA	NA	NA
2016060111	male	RP	AR	RDH12	Compound heterozygous	E4	NM_152443.2:c.146C>T	NP_689656.2:p.(Thr49Met)	NC_000014.8:g.68191267C>T	Lee SA et al., 2010	pathogenic	chr14	68191267	68191267	C	T	1.647e-05	0.0001	1.624e-05	5.798e-05	0.0001
						E7	NM_152443.2:c.505C>T	NP_689656.2:p.(Arg169Trp)	NC_000014.8:g.68193754C>T	Mackay DS et al., 2011	pathogenic	chr14	68193754	68193754	C	T	NA	NA	8.122e-06	0	NA
2016060112	female	RP	AR	USH2A	Compound heterozygous	E70	NM_206933.2:c.15178T>C	NP_996816.2:p.(Ser5060Pro)	NC_000001.10:g.215807920A>G	Katagiri S et al., 2014	pathogenic	chr1	215807920	215807920	A	G	3.295e-05	0.0005	3.655e-05	0.0005	0.0005
						E13	NM_206933.2:c.2802T>G	NP_996816.2:p.(Cys934Trp)	NC_000001.10:g.216419934A>C	Xu W et al., 2011	pathogenic	chr1	216419934	216419934	A	C	0.0002	0.0028	0.0002	0.0024	0.004
2016060113	female	CORD	AR	ABCA4	Compound heterozygous	E20	NM_000350.2:c.2947A>G	NP_000341.2:p.(Thr983Ala)	NC_000001.10:g.94510272T>C	Ernest PJ et al., 2009	pathogenic	chr1	94510272	94510272	T	C	NA	NA	4.061e-06	0	NA
						E8	NM_000350.2:c.1035T>G	NP_000341.2:p.(Tyr345Ter)	NC_000001.10:g.94546098A>C	Novel	pathogenic	chr1	94546098	94546098	A	C	NA	NA	NA	NA	NA
2016041901	female	Usher	AR	USH2A	Compound heterozygous	E63	NM_206933.2:c.13010C>T	NP_996816.2:p.(Thr4337Met)	NC_000001.10:g.215848243G>A	Aller E et al., 2006	pathogenic	chr1	215848243	215848243	G	A	NA	NA	NA	NA	NA
						E2	NM_206933.2:c.80C>A	NP_996816.2:p.(Ser27Ter)	NC_000001.10:g.216595599G>T	Novel	pathogenic	chr1	216595599	216595599	G	T	NA	NA	NA	NA	NA
2016061401	female	RP	AR	CRB1	Compound heterozygous	E8	NM_201253.2:c.2714G>A	NP_957705.1:p.(Arg905Gln)	NC_000001.10:g.197398616G>A	den Hollander AI et al., 2004	pathogenic	chr1	197398616	197398616	G	A	0.0003	0.0035	0.0003	0.003	0.004
							NM_201253.2:c.2809G>A	NP_957705.1:p.(Ala937Thr)	NC_000001.10:g.197398711G>A	Xu Y et al., 2014	pathogenic	chr1	197398711	197398711	G	A	0.0002	0.0029	0.0002	0.0032	0.0029
2016081701	female	RP	AR	RP1	Homozygous	E2	NM_006269.1:c.426dup	NP_006260.1:p.(Ala143SerfsTer86)	NC_000008.10:g.55533952dup	Xu Y et al., 2014	pathogenic	chr8	55533951	55533951	-	A	NA	NA	NA	NA	NA
2016082401	male	RP?	AR	LCA5	Homozygous		NM_181714.3:c.1819_1820del	NP_859065.2:p.(Gln607ValfsTer7)	NC_000006.11:g.80196996_80196997del	Novel	pathogenic	chr6	80196995	80196996	TG	-	NA	NA	8.15e-06	0.0001	NA
2016082402	male	RP?	AR	CRB1	Compound heterozygous	E6	NM_201253.2:c.2056C>T	NP_957705.1:p.(Arg686Cys)	NC_000001.10:g.197391014C>T	Novel	likely pathogenic	chr1	197391014	197391014	C	T	NA	NA	4.069e-06	0	NA
						E7	NM_201253.2:c.2541_2542del	NP_957705.1:p.(Phe848GlnfsTer60)	NC_000001.10:g.197396996_197396997del	Novel	pathogenic	chr1	197396995	197396996	TC	-	NA	NA	NA	NA	NA
2016082403	female	RP?	AR	USH2A	Homozygous	E13	NM_206933.2:c.2802T>G	NP_996816.2:p.(Cys934Trp)	NC_000001.10:g.216419934A>C	Xu W et al., 2011	pathogenic	chr1	216419934	216419934	A	C	0.0002	0.0028	0.0002	0.0024	0.004
2016082404	male	BBS	AR	BBS7	Compound heterozygous	E10	NM_176824.2:c.1002del	NP_789794.1:p.(Asn335IlefsTer47)	NC_000004.11:g.122768595del	Chen X et al., 2013	pathogenic	chr4	122768594	122768594	A	-	1.648e-05	0.0002	1.626e-05	0.0002	0.0002
						E4	NM_176824.2:c.288_289del	NP_789794.1:p.(Gly97LysfsTer7)	NC_000004.11:g.122782713_122782714del	Novel	pathogenic	chr4	122782711	122782712	CT	-	NA	NA	NA	NA	NA
2016082406	female	RP?	AR	USH2A	Compound heterozygous	E42	NM_206933.2:c.8284C>G	NP_996816.2:p.(Pro2762Ala)	NC_000001.10:g.216052380G>C	Chen X et al., 2014	pathogenic	chr1	216052380	216052380	G	C	NA	NA	NA	NA	NA
						E22	NM_206933.2:c.4732C>T	NP_996816.2:p.(Arg1578Cys)	NC_000001.10:g.216270451G>A	Le Quesne SP et al., 2012	pathogenic	chr1	216270451	216270451	G	A	2.503e-05	0	1.626e-05	0	0.0008
2016082407	male	RP?	AR	PDE6A	Compound heterozygous	E13	NM_000440.2:c.1685G>A	NP_000431.2:p.(Arg562Gln)	NC_000005.9:g.149274789C>T	Novel	likely pathogenic	chr5	149274789	149274789	C	T	8.237e-06	0	2.843e-05	0	0.0001
						E10	NM_000440.2:c.1407+1G>C	NP_000431.2:p.?	NC_000005.9:g.149277925C>G	Novel	pathogenic	chr5	149277925	149277925	C	G	7.449e-05	0.001	7.323e-05	0.001	0.001
2016082408	male	RP?	AR	ABCA4	Compound heterozygous	E33	NM_000350.2:c.4773+5G>A	NP_000341.2:p.?	NC_000001.10:g.94487397C>T	Duno M et al., 2012	pathogenic	chr1	94487397	94487397	C	T	NA	NA	NA	NA	NA
						E12	NM_000350.2:c.1561del	NP_000341.2:p.(Val521SerfsTer47)	NC_000001.10:g.94528868del	Xin W et al., 2015	pathogenic	chr1	94528867	94528867	C	-	NA	NA	NA	NA	NA
2016082411	male	MD	AR	RP1	Compound heterozygous		NM_006269.1:c.4743dup	NP_006260.1:p.(Cys1582MetfsTer9)	NC_000008.10:g.55541185dup	Novel	pathogenic	chr8	55541178	55541178	-	A	NA	NA	4.064e-06	0	NA
							NM_006269.1:c.5531dup	NP_006260.1:p.(Glu1845GlyfsTer13)	NC_000008.10:g.55541973dup	Novel	pathogenic	chr8	55541971	55541971	-	A	NA	NA	NA	NA	NA
2016082413	male	CORD-II	AR	TULP1	Compound heterozygous	E14	NM_003322.5:c.1459T>C	NP_003313.3:p.(Ser487Pro)	NC_000006.11:g.35467794A>G	Novel	likely pathogenic	chr6	35467794	35467794	A	G	NA	NA	NA	NA	NA
						E9	NM_003322.5:c.823_826del	NP_003313.3:p.(Lys275ArgfsTer34)	NC_000006.11:g.35474055_35474058del	Novel	pathogenic	chr6	35474053	35474056	CTTT	-	NA	NA	NA	NA	NA
2016082903	male	RP?	AR	SPATA7	Compound heterozygous	E2	NM_018418.4:c.20_23delTCAG	NP_060888.2:p.(Val7GlufsTer19)	NC_000014.8:g.88857725_88857728delTCAG	Novel	pathogenic	chr14	88857723	88857726	AGTC	-	0.0005	0.0063	0.0005	0.0064	0.0069
						E5	NM_018418.4:c.253C>T	NP_060888.2:p.(Arg85Ter)	NC_000014.8:g.88883069C>T	Mackay DS et al., 2011	pathogenic	chr14	88883069	88883069	C	T	5.8e-05	0	7.328e-05	0	0.0004
2016082904	female	RP?	AR	USH2A	Compound heterozygous	E63	NM_206933.2:c.12560G>A	NP_996816.2:p.(Arg4187His)	NC_000001.10:g.215848693C>T	Xin Y et al., 2014	pathogenic	chr1	215848693	215848693	C	T	3.32e-05	0	2.045e-05	0	0.0002
						E28	NM_206933.2:c.5608C>T	NP_996816.2:p.(Arg1870Trp)	NC_000001.10:g.216246607G>A	Miyagawa M et al., 2013	pathogenic	chr1	216246607	216246607	G	A	0.0004	0.0049	0.0003	0.004	0.0049
2016090201	female	RP	AR	USH2A	Homozygous	E13	NM_206933.2:c.2802T>G	NP_996816.2:p.(Cys934Trp)	NC_000001.10:g.216419934A>C	Xu W et al., 2011	pathogenic	chr1	216419934	216419934	A	C	0.0002	0.0028	0.0002	0.0024	0.004
2016090706	male	RP?	AR	ADAM9	Compound heterozygous	E4	NM_003816.2:c.290dup	NP_003807.1:p.(Tyr97Ter)	NC_000008.10:g.38871519dup	Novel	pathogenic	chr8	38871518	38871518	-	A	NA	NA	NA	NA	NA
						E11	NM_003816.2:c.1121C>G	NP_003807.1:p.(Ser374Ter)	NC_000008.10:g.38884320C>G	Novel	pathogenic	chr8	38884320	38884320	C	G	NA	NA	NA	NA	NA
2016102412	female	RP?	AR	USH2A	Compound heterozygous	E22	NM_206933.2:c.4685C>A	NP_996816.2:p.(Ser1562Ter)	NC_000001.10:g.216270498G>T	Novel	pathogenic	chr1	216270498	216270498	G	T	NA	NA	NA	NA	NA
						E13	NM_206933.2:c.2802T>G	NP_996816.2:p.(Cys934Trp)	NC_000001.10:g.216419934A>C	Xu W et al., 2011	pathogenic	chr1	216419934	216419934	A	C	0.0002	0.0028	0.0002	0.0024	0.004
2016102420	male	RP	AR	EYS	Compound heterozygous	E32	NM_001142800.1:c.6545del	NP_001136272.1:p.(Asn2182ThrfsTer3)	NC_000006.11:g.64791777del	Novel	pathogenic	chr6	64791775	64791775	T	-	NA	NA	NA	NA	NA
						E14	NM_001142800.1:c.2259+1G>A	NP_001136272.1:p.?	NC_000006.11:g.65707474C>T	Bonilha VL et al., 2015	pathogenic	chr6	65707474	65707474	C	T	4.491e-05	0	4.601e-05	0	0.0001
2016102425	female	RP	AR	AIPL1	Homozygous	E3	NM_014336.4:c.421C>T	NP_055151.3:p.(Gln141Ter)	NC_000017.10:g.6331682G>A	Yucel-Yilmaz D et al., 2014	pathogenic	chr17	6331682	6331682	G	A	3.303e-05	0.0005	2.045e-05	0.0003	0.001
2016102430	male	RP?	AR	CRB1	Homozygous	E12	NM_201253.2:c.4207G>C	NP_957705.1:p.(Glu1403Gln)	NC_000001.10:g.197446995G>C	Yang L et al., 2014	pathogenic	chr1	197446995	197446995	G	C	NA	NA	NA	NA	NA
2016103102	female	CORD	AR	USH2A	Compound heterozygous	E61	NM_206933.2:c.11754G>A	NP_996816.2:p.(Trp3918Ter)	NC_000001.10:g.215901684C>T	Baux D et al., 2014	pathogenic	chr1	215901684	215901684	C	T	NA	NA	NA	NA	NA
						E13	NM_206933.2:c.2802T>G	NP_996816.2:p.(Cys934Trp)	NC_000001.10:g.216419934A>C	Xu W et al., 2011	pathogenic	chr1	216419934	216419934	A	C	0.0002	0.0028	0.0002	0.0024	0.004
2016103103	male	Usher	AR	USH2A	Compound heterozygous	E57	NM_206933.2:c.11156G>A	NP_996816.2:p.(Arg3719His)	NC_000001.10:g.215933077C>T	Chen X et al., 2014	pathogenic	chr1	215933077	215933077	C	T	5.769e-05	0.0001	5.283e-05	0.0002	0.0003
						E11	NM_206933.2:c.1876C>T	NP_996816.2:p.(Arg626Ter)	NC_000001.10:g.216462717G>A	Weston MD et al., 2000	pathogenic	chr1	216462717	216462717	G	A	8.24e-06	0	2.032e-05	0	0
2016110801	female	RP	AR	BEST1	Compound heterozygous	E4	NM_004183.3:c.449G>T	NP_004174.1:p.(Arg150Leu)	NC_000011.9:g.61723391G>T	Novel	likely pathogenic	chr11	61723391	61723391	G	T	NA	NA	NA	NA	NA
						E7	NM_004183.3:c.830C>T	NP_004174.1:p.(Thr277Met)	NC_000011.9:g.61725733C>T	Zaneveld J et al., 2015	pathogenic	chr11	61725733	61725733	C	T	8.24e-06	0	8.122e-06	0	0
2016111406	male	CORD	AR	USH2A	Compound heterozygous	E61	NM_206933.2:c.11865G>A	NP_996816.2:p.(Trp3955Ter)	NC_000001.10:g.215901573C>T	Novel	pathogenic	chr1	215901573	215901573	C	T	NA	NA	NA	NA	NA
						E27	NM_206933.2:c.5329C>T	NP_996816.2:p.(Arg1777Trp)	NC_000001.10:g.216251674G>A	Nakanishi H et al., 2011	pathogenic	chr1	216251674	216251674	G	A	8.255e-06	0	4.073e-06	0	0.0001
2016111416	female	LCA	AR	CNGA1	Homozygous	E6	NM_000087.3:c.265del	NP_000078.2:p.(Leu89PhefsTer4)	NC_000004.11:g.47951884del	Chen X et al., 2013	pathogenic	chr4	47951884	47951884	G	-	9.129e-05	0.0013	0.0001	0.0014	0.0013
2016111417	male	CORD	AR	PDE6B	Homozygous	E19	NM_000283.3:c.2204T>C	NP_000274.2:p.(Leu735Pro)	NC_000004.11:g.659054T>C	Novel	likely pathogenic	chr4	659054	659054	T	C	NA	NA	4.066e-06	5.8e-05	NA
2016111420	male	LCA	AR	PDE6B	Homozygous	E1	NM_000283.3:c.3dup	NP_000274.2:p.(Met1?)	NC_000004.11:g.619418dup	Novel	likely pathogenic	chr4	619417	619417	-	G	NA	NA	4.095e-06	5.798e-05	NA
2016112103	female	RP(-I-II)	AR	USH2A	Homozygous	E13	NM_206933.2:c.2802T>G	NP_996816.2:p.(Cys934Trp)	NC_000001.10:g.216419934A>C	Xu W et al., 2011	pathogenic	chr1	216419934	216419934	A	C	0.0002	0.0028	0.0002	0.0024	0.004
2016112104	male	Usher	AR	MYO7A	Compound heterozygous	E9	NM_000260.3:c.1003+1G>A	NP_000251.3:p.?	NC_000011.9:g.76869477G>A	Novel	pathogenic	chr11	76869477	76869477	G	A	NA	NA	NA	NA	NA
						E40	NM_000260.3:c.5581C>T	NP_000251.3:p.(Arg1861Ter)	NC_000011.9:g.76916607C>T	Adato A et al., 1997	pathogenic	chr11	76916607	76916607	C	T	NA	NA	8.213e-06	0	NA
2016112112	female	RP?	AR	EYS	Homozygous	E26	NM_001142800.1:c.5254dup	NP_001136272.1:p.(Ile1752AsnfsTer18)	NC_000006.11:g.65300508dup	Novel	pathogenic	chr6	65300505	65300505	-	T	NA	NA	NA	NA	NA
2016112117	male	LCA	AR	RDH12	Homozygous	E6	NM_152443.2:c.437T>A	NP_689656.2:p.(Val146Asp)	NC_000014.8:g.68192861T>A	Fu Q et al., 2013	pathogenic	chr14	68192861	68192861	T	A	NA	NA	1.218e-05	0.0002	NA
2016112801	male	RP	AR	RLBP1	Compound heterozygous	E9	NM_000326.4:c.811del	NP_000317.1:p.(Asp271MetfsTer58)	NC_000015.9:g.89753662del	Novel	pathogenic	chr15	89753659	89753659	C	-	NA	NA	NA	NA	NA
						E4	NM_000326.4:c.34_44del	NP_000317.1:p.(Pro12ThrfsTer36)	NC_000015.9:g.89761894_89761904del	Novel	pathogenic	chr15	89761893	89761903	TCCTCTTCAGG	-	NA	NA	NA	NA	NA
2016112804	male	RP	AR	CRB1	Compound heterozygous	E2	NM_201253.2:c.139del	NP_957705.1:p.(Asp47IlefsTer24)	NC_000001.10:g.197297620del	Novel	pathogenic	chr1	197297620	197297620	G	-	NA	NA	NA	NA	NA
						E9	NM_201253.2:c.2981_2982del	NP_957705.1:p.(Lys994ArgfsTer3)	NC_000001.10:g.197403974_197403975del	Novel	pathogenic	chr1	197403971	197403972	AA	-	NA	NA	NA	NA	NA
2016112808	male	STGD?	AR	ABCA4	Compound heterozygous	E48	NM_000350.2:c.6563T>C	NP_000341.2:p.(Phe2188Ser)	NC_000001.10:g.94463583A>G	Fukui T et al., 2002	pathogenic	chr1	94463583	94463583	A	G	1.648e-05	0.0001	8.122e-06	5.8e-05	0.0011
						E23	NM_000350.2:c.3352C>T	NP_000341.2:p.(His1118Tyr)	NC_000001.10:g.94506935G>A	Novel	likely pathogenic	chr1	94506935	94506935	G	A	8.239e-06	0	4.061e-06	0	0.0002
2016112809	male	CORD-III	AR	USH2A	Compound heterozygous	E63	NM_206933.2:c.12580T>C	NP_996816.2:p.(Cys4194Arg)	NC_000001.10:g.215848673A>G	Lenassi E et al., 2015	pathogenic	chr1	215848673	215848673	A	G	NA	NA	4.096e-06	0	NA
						E13	NM_206933.2:c.2802T>G	NP_996816.2:p.(Cys934Trp)	NC_000001.10:g.216419934A>C	Xu W et al., 2011	pathogenic	chr1	216419934	216419934	A	C	0.0002	0.0028	0.0002	0.0024	0.004
2016112811	female	CORD-III?	AR	USH2A	Compound heterozygous	E64	NM_206933.2:c.13836C>A	NP_996816.2:p.(Cys4612Ter)	NC_000001.10:g.215844611G>T	Novel	pathogenic	chr1	215844611	215844611	G	T	NA	NA	NA	NA	NA
						E37	NM_206933.2:c.7036_7057del	NP_996816.2:p.(His2346PhefsTer7)	NC_000001.10:g.216138722_216138743del	Novel	pathogenic	chr1	216138722	216138743	AAGGTGCTTCCCACCTCACGTG	-	NA	NA	NA	NA	NA
2016112816	male	RP	AR	CYP4V2	Homozygous	E7	NM_207352.3:c.802-8_810delinsGC	NP_997235.3:p.?	NC_000004.11:g.187122303_187122319delinsGC	Wada Y et al., 2005	pathogenic	chr4	187122303	187122319	TCATACAGGTCATCGCT	GC	NA	NA	NA	NA	NA
2016112813	male	RP?	AR	USH2A	Homozygous	E43	NM_206933.2:c.8559-2A>G	NP_996816.2:p.?	NC_000001.10:g.216051224T>C	Dai H et al., 2008	pathogenic	chr1	216051224	216051224	T	C	2.473e-05	0.0003	3.253e-05	0.0005	0.001
2016112814	female	RP?	AR	USH2A	Homozygous	E43	NM_206933.2:c.8559-2A>G	NP_996816.2:p.?	NC_000001.10:g.216051224T>C	Dai H et al., 2008	pathogenic	chr1	216051224	216051224	T	C	2.473e-05	0.0003	3.253e-05	0.0005	0.001
2016120508	male	RP	AR	MERTK	Homozygous	E2	NM_006343.2:c.296_297del	NP_006334.2:p.(Thr99SerfsTer8)	NC_000002.11:g.112686931_112686932del	Novel	pathogenic	chr2	112686926	112686927	AC	-	1.647e-05	0.0001	1.218e-05	0.0001	0.0002
2016120512	female	RP	AR	EYS	Compound heterozygous	E43	NM_001142800.1:c.8326del	NP_001136272.1:p.(Val2776Ter)	NC_000006.11:g.64431601del	Novel	pathogenic	chr6	64431601	64431601	C	-	NA	NA	NA	NA	NA
						E14	NM_001142800.1:c.2259+1G>A	NP_001136272.1:p.?	NC_000006.11:g.65707474C>T	Bonilha VL et al., 2015	pathogenic	chr6	65707474	65707474	C	T	4.491e-05	0	4.601e-05	0	0.0001
2016120514	male	RP	AR	CYP4V2	Compound heterozygous	E7	NM_207352.3:c.802-8_810delinsGC	NP_997235.3:p.?	NC_000004.11:g.187122303_187122319delinsGC	Wada Y et al., 2005	pathogenic	chr4	187122303	187122319	TCATACAGGTCATCGCT	GC	NA	NA	NA	NA	NA
						E9	NM_207352.3:c.1091-2A>G	NP_997235.3:p.?	NC_000004.11:g.187130017A>G	Li A et al., 2004	pathogenic	chr4	187130017	187130017	A	G	3.295e-05	0.0003	4.873e-05	0.0006	0.0003
2016121202	female	RP	AR	USH2A	Homozygous	E13	NM_206933.2:c.2802T>G	NP_996816.2:p.(Cys934Trp)	NC_000001.10:g.216419934A>C	Xu W et al., 2011	pathogenic	chr1	216419934	216419934	A	C	0.0002	0.0028	0.0002	0.0024	0.004
2016121212	male	RP	AR	NMNAT1	Compound heterozygous	E3	NM_022787.3:c.179_180insA	NP_073624.2:p.(Ile61HisfsTer18)	NC_000001.10:g.10035713_10035714insA	Novel	pathogenic	chr1	10035713	10035713	-	A	NA	NA	NA	NA	NA
						E5	NM_022787.3:c.710G>A	NP_073624.2:p.(Arg237His)	NC_000001.10:g.10042629G>A	Novel	likely pathogenic	chr1	10042629	10042629	G	A	3.298e-05	0.0003	4.469e-05	0.0005	0.0003
2016121218	male	RP	AR	CYP4V2	Homozygous	E9	NM_207352.3:c.1091-2A>G	NP_997235.3:p.?	NC_000004.11:g.187130017A>G	Li A et al., 2004	pathogenic	chr4	187130017	187130017	A	G	3.295e-05	0.0003	4.873e-05	0.0006	0.0003
2016121902	female	LCA	AR	PDE6B	Compound heterozygous	E11	NM_000283.3:c.1467+1G>C	NP_000274.2:p.?	NC_000004.11:g.652807G>C	Fu Q et al., 2013	pathogenic	chr4	652807	652807	G	C	NA	NA	8.144e-06	0.0001	NA
						E1	NM_000283.3:c.220C>T	NP_000274.2:p.(Arg74Cys)	NC_000004.11:g.619635C>T	van Huet RA et al., 2015	pathogenic	chr4	619635	619635	C	T	0.0006	0.0001	0.0005	0.0003	0.001
2016121905	male	RP	AR	CYP4V2	Homozygous	E7	NM_207352.3:c.802-8_810delinsGC	NP_997235.3:p.?	NC_000004.11:g.187122303_187122319delinsGC	Wada Y et al., 2005	pathogenic	chr4	187122303	187122319	TCATACAGGTCATCGCT	GC	NA	NA	NA	NA	NA
2016121907	male	CORD	AR	CYP4V2	Homozygous	E7	NM_207352.3:c.802-8_810delinsGC	NP_997235.3:p.?	NC_000004.11:g.187122303_187122319delinsGC	Wada Y et al., 2005	pathogenic	chr4	187122303	187122319	TCATACAGGTCATCGCT	GC	NA	NA	NA	NA	NA
2016121911	male	CORD	AR	USH2A	Compound heterozygous	E55	NM_206933.2:c.10830G>C	NP_996816.2:p.(Trp3610Cys)	NC_000001.10:g.215953294C>G	Novel	likely pathogenic	chr1	215953294	215953294	C	G	NA	NA	NA	NA	NA
						E24	NM_206933.2:c.4948G>A	NP_996816.2:p.(Gly1650Arg)	NC_000001.10:g.216260100C>T	Novel	likely pathogenic	chr1	216260100	216260100	C	T	NA	NA	NA	NA	NA
2016121912	male	Usher	AR	USH2A	Compound heterozygous	E59	NM_206933.2:c.11533C>T	NP_996816.2:p.(Gln3845Ter)	NC_000001.10:g.215916534G>A	McGee TL et al., 2010	pathogenic	chr1	215916534	215916534	G	A	NA	NA	NA	NA	NA
						E54	NM_206933.2:c.10612C>T	NP_996816.2:p.(Arg3538Ter)	NC_000001.10:g.215955512G>A	Jiang L et al., 2015	pathogenic	chr1	215955512	215955512	G	A	NA	NA	4.065e-06	5.802e-05	NA
2016121915	male	RP?	AR	USH2A	Compound heterozygous	E43	NM_206933.2:c.8559-2A>G	NP_996816.2:p.?	NC_000001.10:g.216051224T>C	Dai H et al., 2008	pathogenic	chr1	216051224	216051224	T	C	2.473e-05	0.0003	3.253e-05	0.0005	0.001
						E18	NM_206933.2:c.3862G>T	NP_996816.2:p.(Glu1288Ter)	NC_000001.10:g.216371876C>A	Novel	pathogenic	chr1	216371876	216371876	C	A	NA	NA	NA	NA	NA
2016121919	male	RP?	AR	ADGRV1	Compound heterozygous	E7	NM_032119.3:c.929G>A	NP_115495.3:p.(Gly310Glu)	NC_000005.9:g.89923284G>A	Jiang L et al., 2015	pathogenic	chr5	89923284	89923284	G	A	9.109e-05	0.001	9.345e-05	0.001	0.001
						E88	NM_032119.3:c.18601A>C	NP_115495.3:p.(Asn6201His)	NC_000005.9:g.90446015A>C	Novel	likely pathogenic	chr5	90446015	90446015	A	C	9.414e-05	0.0012	7.213e-05	0.001	0.002
2016122601	male	RP	AR	USH2A	Compound heterozygous	E63	NM_206933.2:c.12580T>C	NP_996816.2:p.(Cys4194Arg)	NC_000001.10:g.215848673A>G	Lenassi E et al., 2015	pathogenic	chr1	215848673	215848673	A	G	NA	NA	4.096e-06	0	NA
						E2	NM_206933.2:c.99_100insT	NP_996816.2:p.(Arg34SerfsTer41)	NC_000001.10:g.216595579_216595580insA	Dai H et al., 2008	pathogenic	chr1	216595579	216595579	-	A	NA	NA	NA	NA	NA
2017010401	female	RP?	AR	MYO7A	Compound heterozygous	E29	NM_000260.3:c.3696_3706del	NP_000251.3:p.(Arg1232SerfsTer72)	NC_000011.9:g.76901130_76901140del	Jiang L et al., 2015	pathogenic	chr11	76901129	76901139	GAAGGACCTTT	-	NA	NA	5.255e-06	7.419e-05	NA
						E31	NM_000260.3:c.4108C>T	NP_000251.3:p.(Gln1370Ter)	NC_000011.9:g.76903279C>T	Novel	pathogenic	chr11	76903279	76903279	C	T	NA	NA	NA	NA	NA
2017010402	female	RP?	AR	C21orf2	Compound heterozygous	E4	NM_004928.2:c.144-6_159del	NP_004919.1:p.?	NC_000021.8:g.45753135_45753156del	Novel	pathogenic	chr21	45753130	45753151	GGAGATGCTGTTGACACTGCAC	-	NA	NA	NA	NA	NA
						E3	NM_004928.2:c.137C>T	NP_004919.1:p.(Thr46Met)	NC_000021.8:g.45755647G>A	Novel	likely pathogenic	chr21	45755647	45755647	G	A	0	0	1.442e-05	6.671e-05	0
2017010403	female	RP?	AR	USH2A	Compound heterozygous	E70	NM_206933.2:c.15178T>C	NP_996816.2:p.(Ser5060Pro)	NC_000001.10:g.215807920A>G	Katagiri S et al., 2014	pathogenic	chr1	215807920	215807920	A	G	3.295e-05	0.0005	3.655e-05	0.0005	0.0005
						E43	NM_206933.2:c.8559-2A>G	NP_996816.2:p.?	NC_000001.10:g.216051224T>C	Dai H et al., 2008	pathogenic	chr1	216051224	216051224	T	C	2.473e-05	0.0003	3.253e-05	0.0005	0.001
2017010404	female	CORD-II	AR	USH2A	Compound heterozygous	E55	NM_206933.2:c.10859T>C	NP_996816.2:p.(Ile3620Thr)	NC_000001.10:g.215953265A>G	Katagiri S et al., 2014	pathogenic	chr1	215953265	215953265	A	G	8.238e-06	0	1.219e-05	0.0001	0.0001
						E13	NM_206933.2:c.2802T>G	NP_996816.2:p.(Cys934Trp)	NC_000001.10:g.216419934A>C	Xu W et al., 2011	pathogenic	chr1	216419934	216419934	A	C	0.0002	0.0028	0.0002	0.0024	0.004
2017010406	male	RP?	AR	ABCA4	Compound heterozygous	E44	NM_000350.2:c.6050G>A	NP_000341.2:p.(Cys2017Tyr)	NC_000001.10:g.94471094C>T	Jiang F et al., 2016	pathogenic	chr1	94471094	94471094	C	T	NA	NA	NA	NA	NA
						E36	NM_000350.2:c.5196+1G>A	NP_000341.2:p.?	NC_000001.10:g.94485137C>T	Allikmets R et al., 1997	pathogenic	chr1	94485137	94485137	C	T	6.017e-05	0	2.21e-05	0	0.0003
2017010902	male	LCA?	AR	TRPM1	Compound heterozygous	E8	NM_002420.5:c.910G>T	NP_002411.3:p.(Glu304Ter)	NC_000015.9:g.31354895C>A	Novel	pathogenic	chr15	31354895	31354895	C	A	NA	NA	NA	NA	NA
						E5	NM_002420.5:c.428G>A	NP_002411.3:p.(Gly143Asp)	NC_000015.9:g.31359390C>T	Novel	likely pathogenic	chr15	31359390	31359390	C	T	NA	NA	NA	NA	NA
2017010909	male	CORD-III	AR	RDH12	Homozygous	E6	NM_152443.2:c.437T>A	NP_689656.2:p.(Val146Asp)	NC_000014.8:g.68192861T>A	Fu Q et al., 2013	pathogenic	chr14	68192861	68192861	T	A	NA	NA	1.218e-05	0.0002	NA
2016041902	male	RP	X-linked	RPGR	Hemizygous	E4	NM_000328.2:c.310+3A>G	NP_000319.1:p.?	NC_000023.10:g.38180277T>C	Buraczynska M et al., 1997	pathogenic	chrX	38180277	38180277	T	C	NA	NA	NA	NA	NA
2016071202	male	RP	X-linked	RPGR	Hemizygous	E2	NM_000328.2:c.29-2A>T	NP_000319.1:p.?	NC_000023.10:g.38182779T>A	Novel	pathogenic	chrX	38182779	38182779	T	A	NA	NA	NA	NA	NA
2016082901	male	RP?	X-linked	RPGR	Hemizygous	E13	NM_000328.2:c.1399C>T	NP_000319.1:p.(Gln467Ter)	NC_000023.10:g.38156552G>A	Rosenberg T et al., 1999	pathogenic	chrX	38156552	38156552	G	A	NA	NA	NA	NA	NA
2016091401	male	CSNB	X-linked	NYX	Hemizygous	E2	NM_022567.2:c.1037G>A	NP_072089.1:p.(Trp346Ter)	NC_000023.10:g.41333743G>A	Novel	pathogenic	chrX	41333743	41333743	G	A	NA	NA	NA	NA	NA
2016102426	male	RP	X-linked	CHM	Hemizygous	E5	NM_000390.3:c.315-1G>C	NP_000381.1:p.?	NC_000023.10:g.85219058C>G	Novel	pathogenic	chrX	85219058	85219058	C	G	NA	NA	NA	NA	NA
2016111404	male	RP?	X-linked	RPGR	Hemizygous	ORF15	NM_000328.2:c.1754-3C>G	NP_000319.1:p.?	NC_000023.10:g.38146501G>C	Novel	likely pathogenic	chrX	38146501	38146501	G	C	NA	NA	NA	NA	NA
2016112118	male	RP?	X-linked	RPGR	Hemizygous	E5	NM_000328.2:c.373G>T	NP_000319.1:p.(Glu125Ter)	NC_000023.10:g.38178178C>A	Novel	pathogenic	chrX	38178178	38178178	C	A	NA	NA	NA	NA	NA
2016121204	male	CSNB	X-linked	FRMD7	Hemizygous	E12	NM_194277.2:c.1266_1269dup	NP_919253.1:p.(Asn424LeufsTer2)	NC_000023.10:g.131212777_131212780dup	Novel	pathogenic	chrX	131212775	131212775	-	AAAG	NA	NA	NA	NA	NA
