# Supplementary material for: Application of Whole Exome and Targeted Panel Sequencing in the Clinical Molecular Diagnosis of 319 Chinese Families with Inherited Retinal Dystrophy and Comparison Study
Source: Genes (Basel). 2018 Jul 19;9(7):360. doi: 10.3390/genes9070360 (PMC6071067; doi:10.3390/genes9070360)
Supplement: Supplementary file 1 [file genes-09-00360-s001.zip › TableS2.xlsx]

## Sheet: Sheet1
Table S2. Clinical data and pathogenic mutations are listed for 30 probands with whole
exome sequencing.
Family ID	Gender	Initial Diagnosis	Inheritance	Gene	Genotype	Exon Number	HGVS_transcript_variant	HGVS_predicted_protein_consequence	HGVS_genomic_variant	Reference	Classification	Chr	Start	End	Ref	Alt	ExAC_ALL	ExAC_EAS	gnomAD_exome_ALL	gnomAD_exome_EAS	PopFreqMax
2016090902	male	BBS	AR	BBS10	Compound heterozygous	E2	NM_024685.3:c.1063C>T	NP_078961.3:p.(Gln355Ter)	NC_000012.11:g.76740702G>A	Novel	pathogenic	chr12	76740702	76740702	G	A	NA	NA	NA	NA	NA
						E2	NM_024685.3:c.378G>A	NP_078961.3:p.(Trp126Ter)	NC_000012.11:g.76741387C>T	Novel	pathogenic	chr12	76741387	76741387	C	T	NA	NA	NA	NA	NA
2016091201	male	Usher	AR	USH2A	Compound heterozygous	E21	NM_206933.2:c.4627+1G>A	NP_996816.2:p.?	NC_000001.10:g.216348593C>T	Novel	pathogenic	chr1	216348593	216348593	C	T	NA	NA	NA	NA	NA
						E13	NM_206933.2:c.2802T>G	NP_996816.2:p.(Cys934Trp)	NC_000001.10:g.216419934A>C	Xu W et al., 2011	pathogenic	chr1	216419934	216419934	A	C	0.0002	0.0028	0.0002	0.0024	0.004
2016092106	male	RP	AR	CERKL	Homozygous	E13	NM_001030311.2:c.1467_1470dup	NP_001025482.1:p.(Thr491LeufsTer4)	NC_000002.11:g.182403967_182403970dup	Novel	pathogenic	chr2	182403964	182403964	-	GTAA	NA	NA	4.072e-06	5.813e-05	NA
2016092109	male	RP	AR	RPE65	Homozygous	E3	NM_000329.2:c.188G>A	NP_000320.1:p.(Gly63Glu)	NC_000001.10:g.68912450C>T	Novel	likely pathogenic	chr1	68912450	68912450	C	T	NA	NA	NA	NA	NA
2016092601	female	RP	AR	USH2A	Compound heterozygous	E61	NM_206933.2:c.11806A>C	NP_996816.2:p.(Thr3936Pro)	NC_000001.10:g.215901632T>G	Dai H et al., 2008	pathogenic	chr1	215901632	215901632	T	G	NA	NA	NA	NA	NA
						E3	NM_206933.2:c.538T>C	NP_996816.2:p.(Ser180Pro)	NC_000001.10:g.216591969A>G	Nakanishi H et al., 2009	pathogenic	chr1	216591969	216591969	A	G	NA	NA	8.143e-06	0.0001	NA
2016092605	male	RP	AR	USH2A	Compound heterozygous	E63	NM_206933.2:c.13010C>T	NP_996816.2:p.(Thr4337Met)	NC_000001.10:g.215848243G>A	Aller E et al., 2006	pathogenic	chr1	215848243	215848243	G	A	NA	NA	NA	NA	NA
						E8	NM_206933.2:c.1397G>T	NP_996816.2:p.(Gly466Val)	NC_000001.10:g.216496969C>A	Xu Y et al., 2014	pathogenic	chr1	216496969	216496969	C	A	NA	NA	NA	NA	NA
2016092613	male	RP	AR	USH2A	Homozygous	E43	NM_206933.2:c.8559-2A>G	NP_996816.2:p.?	NC_000001.10:g.216051224T>C	Dai H et al., 2008	pathogenic	chr1	216051224	216051224	T	C	2.473e-05	0.0003	3.253e-05	0.0005	0.001
2016092618	female	RP	AR	ABCA4	Compound heterozygous	E16	NM_000350.2:c.2424C>G	NP_000341.2:p.(Tyr808Ter)	NC_000001.10:g.94520830G>C	Zhou Y et al., 2014	pathogenic	chr1	94520830	94520830	G	C	NA	NA	NA	NA	NA
						E13	NM_000350.2:c.1933G>A	NP_000341.2:p.(Asp645Asn)	NC_000001.10:g.94528137C>T	Lewis RA et al., 1999	pathogenic	chr1	94528137	94528137	C	T	8.261e-06	0	2.034e-05	0	0
2016101001	male	RP	AR	PDE6B	Compound heterozygous	E1	NM_000283.3:c.385G>A	NP_000274.2:p.(Glu129Lys)	NC_000004.11:g.619800G>A	Novel	likely pathogenic	chr4	619800	619800	G	A	7.25e-05	0	1.466e-05	0	0.0001
						E12	NM_000283.3:c.1613_1614+1del	NP_000274.2:p.(Glu538del)	NC_000004.11:g.654401_654403del	Novel	likely pathogenic	chr4	654398	654400	AGG	-	NA	NA	NA	NA	NA
2016101102	male	RP?	AR	USH2A	Compound heterozygous	E31	NM_206933.2:c.6083A>G	NP_996816.2:p.(Tyr2028Cys)	NC_000001.10:g.216221956T>C	Novel	likely pathogenic	chr1	216221956	216221956	T	C	2.471e-05	0.0003	1.218e-05	0.0002	0.0003
						E13	NM_206933.2:c.2802T>G	NP_996816.2:p.(Cys934Trp)	NC_000001.10:g.216419934A>C	Xu W et al., 2011	pathogenic	chr1	216419934	216419934	A	C	0.0002	0.0028	0.0002	0.0024	0.004
2016101005	male	RP	AR	CDHR1	Compound heterozygous	E11	NM_033100.3:c.1041del	NP_149091.1:p.(Asn347LysfsTer21)	NC_000010.10:g.85968007del	Novel	pathogenic	chr10	85968007	85968007	C	-	NA	NA	NA	NA	NA
						E13	NM_033100.3:c.1485+1G>A	NP_149091.1:p.?	NC_000010.10:g.85970922G>A	Novel	pathogenic	chr10	85970922	85970922	G	A	NA	NA	NA	NA	NA
2016101006	male	RP	AR	USH2A	Compound heterozygous	E66	NM_206933.2:c.14411G>A	NP_996816.2:p.(Gly4804Glu)	NC_000001.10:g.215822041C>T	Novel	likely pathogenic	chr1	215822041	215822041	C	T	NA	NA	NA	NA	NA
						E43	NM_206933.2:c.8559-2A>G	NP_996816.2:p.?	NC_000001.10:g.216051224T>C	Dai H et al., 2008	pathogenic	chr1	216051224	216051224	T	C	2.473e-05	0.0003	3.253e-05	0.0005	0.001
2016101007	male	RP	AR	USH2A	Compound heterozygous	E43	NM_206933.2:c.8559-2A>G	NP_996816.2:p.?	NC_000001.10:g.216051224T>C	Dai H et al., 2008	pathogenic	chr1	216051224	216051224	T	C	2.473e-05	0.0003	3.253e-05	0.0005	0.001
						E17	NM_206933.2:c.3788G>A	NP_996816.2:p.(Trp1263Ter)	NC_000001.10:g.216372992C>T	Xu W et al., 2011	pathogenic	chr1	216372992	216372992	C	T	NA	NA	NA	NA	NA
2016101012	female	RP	AR	EYS	Homozygous	E31	NM_001142800.1:c.6416G>A	NP_001136272.1:p.(Cys2139Tyr)	NC_000006.11:g.64940493C>T	Audo I et al., 2010	pathogenic	chr6	64940493	64940493	C	T	5.274e-05	0.0017	0.0001	0.0016	0.0017
2016101011	female	RP?	AR	USH2A	Compound heterozygous	E43	NM_206933.2:c.8559-2A>G	NP_996816.2:p.?	NC_000001.10:g.216051224T>C	Dai H et al., 2008	pathogenic	chr1	216051224	216051224	T	C	2.473e-05	0.0003	3.253e-05	0.0005	0.001
						E41	NM_206933.2:c.8167C>T	NP_996816.2:p.(Arg2723Ter)	NC_000001.10:g.216061824G>A	Jaijo T et al., 2010	pathogenic	chr1	216061824	216061824	G	A	8.249e-06	0	4.069e-06	0	0.0008
2016061402	male	CORD	AR	C2orf71	Homozygous	E2	NM_001029883.2:c.898del	NP_001025054.1:p.(Leu300SerfsTer12)	NC_000002.11:g.29296231del	Novel	pathogenic	chr2	29296230	29296230	G	-	NA	NA	NA	NA	NA
2016061403	male	LCA	AR	GUCY2D	Compound heterozygous	E4	NM_000180.3:c.1027-2A>G	NP_000171.1:p.?	NC_000017.10:g.7909679A>G	Novel	pathogenic	chr17	7909679	7909679	A	G	NA	NA	NA	NA	NA
						E2	NM_000180.3:c.244_250dup	NP_000171.1:p.(Leu84ArgfsTer237)	NC_000017.10:g.7906609_7906615dup	Novel	pathogenic	chr17	7906603	7906603	-	CCGCCGC	NA	NA	NA	NA	NA
2016101016	female	RP?	AR	USH2A	Homozygous	E43	NM_206933.2:c.8559-2A>G	NP_996816.2:p.?	NC_000001.10:g.216051224T>C	Dai H et al., 2008	pathogenic	chr1	216051224	216051224	T	C	2.473e-05	0.0003	3.253e-05	0.0005	0.001
2016101017	female	RP?	AR	USH2A	Homozygous	E43	NM_206933.2:c.8559-2A>G	NP_996816.2:p.?	NC_000001.10:g.216051224T>C	Dai H et al., 2008	pathogenic	chr1	216051224	216051224	T	C	2.473e-05	0.0003	3.253e-05	0.0005	0.001
2016101023	male	LCA	AR	USH2A	Compound heterozygous	E43	NM_206933.2:c.8559-2A>G	NP_996816.2:p.?	NC_000001.10:g.216051224T>C	Dai H et al., 2008	pathogenic	chr1	216051224	216051224	T	C	2.473e-05	0.0003	3.253e-05	0.0005	0.001
						E33	NM_206933.2:c.6383G>A	NP_996816.2:p.(Cys2128Tyr)	NC_000001.10:g.216173847C>T	McGee TL et al., 2010	pathogenic	chr1	216173847	216173847	C	T	NA	NA	NA	NA	NA
2016101706	male	RP	AR	PDE6A	Compound heterozygous	E13	NM_000440.2:c.1651A>G	NP_000431.2:p.(Lys551Glu)	NC_000005.9:g.149274823T>C	Novel	likely pathogenic	chr5	149274823	149274823	T	C	NA	NA	NA	NA	NA
						E1	NM_000440.2:c.285C>A	NP_000431.2:p.(Ser95Arg)	NC_000005.9:g.149323952G>T	Novel	likely pathogenic	chr5	149323952	149323952	G	T	NA	NA	NA	NA	NA
2016101710	female	RP	AR	PDE6A	Compound heterozygous	E20	NM_000440.2:c.2275-2A>G	NP_000431.2:p.?	NC_000005.9:g.149245818T>C	Novel	pathogenic	chr5	149245818	149245818	T	C	NA	NA	NA	NA	NA
						E16	NM_000440.2:c.1957C>T	NP_000431.2:p.(Arg653Ter)	NC_000005.9:g.149264112G>A	Perez-Carro R et al., 2016	pathogenic	chr5	149264112	149264112	G	A	3.302e-05	0	2.847e-05	5.8e-05	0.0002
2016101712	female	RP	AR	USH2A	Compound heterozygous	E70	NM_206933.2:c.15178T>C	NP_996816.2:p.(Ser5060Pro)	NC_000001.10:g.215807920A>G	Katagiri S et al., 2014	pathogenic	chr1	215807920	215807920	A	G	3.295e-05	0.0005	3.655e-05	0.0005	0.0005
						E24	NM_206933.2:c.4957C>T	NP_996816.2:p.(Arg1653Ter)	NC_000001.10:g.216260091G>A	Dreyer B et al., 2008	pathogenic	chr1	216260091	216260091	G	A	2.518e-05	0	1.63e-05	0	0.0001
2016101713	female	CORD?	AR	ALMS1	Compound heterozygous	E10	NM_015120.4:c.9154_9155delCT	NP_055935.4:p.(Cys3053SerfsTer9)	NC_000002.11:g.73718237_73718238delCT	Novel	pathogenic	chr2	73718235	73718236	CT	-	NA	NA	NA	NA	NA
						E16	NM_015120.4:c.10825C>T	NP_055935.4:p.(Arg3609Ter)	NC_000002.11:g.73799826C>T	Marshall JD et al., 2007	pathogenic	chr2	73799826	73799826	C	T	NA	NA	NA	NA	NA
2016101718	male	RP	AR	CYP4V2	Compound heterozygous	E1	NM_207352.3:c.214+1G>T	NP_997235.3:p.?	NC_000004.11:g.187113192G>T	Novel	pathogenic	chr4	187113192	187113192	G	T	NA	NA	NA	NA	NA
						E9	NM_207352.3:c.1091-2A>G	NP_997235.3:p.?	NC_000004.11:g.187130017A>G	Li A et al., 2004	pathogenic	chr4	187130017	187130017	A	G	3.295e-05	0.0003	4.873e-05	0.0006	0.0003
2016101720	female	RP	AR	USH2A	Compound heterozygous	E65	NM_206933.2:c.14222C>T	NP_996816.2:p.(Pro4741Leu)	NC_000001.10:g.215824055G>A	Novel	likely pathogenic	chr1	215824055	215824055	G	A	NA	NA	NA	NA	NA
						E51	NM_206933.2:c.10049dup	NP_996816.2:p.(Asn3351GlufsTer2)	NC_000001.10:g.215963538dup	Novel	pathogenic	chr1	215963533	215963533	-	T	NA	NA	NA	NA	NA
2016101722	female	RP	AR	CYP4V2	Homozygous	E2	NM_207352.3:c.215-2A>G	NP_997235.3:p.?	NC_000004.11:g.187115652A>G	Xiao X et al., 2011	pathogenic	chr4	187115652	187115652	A	G	NA	NA	NA	NA	NA
2016101725	female	RP	AR	C8orf37	Compound heterozygous	E6	NM_177965.3:c.529C>T	NP_808880.1:p.(Arg177Trp)	NC_000008.10:g.96259940G>A	Estrada-Cuzcano A et al., 2012	pathogenic	chr8	96259940	96259940	G	A	1.651e-05	0	2.034e-05	0	0.0001
						E2	NM_177965.3:c.172A>T	NP_808880.1:p.(Lys58Ter)	NC_000008.10:g.96275986T>A	Novel	pathogenic	chr8	96275986	96275986	T	A	NA	NA	4.084e-06	0	NA
2016102401	female	RP	AR	PCDH15	Homozygous	E15	NM_033056.3:c.1863_1864dup	NP_149045.3:p.(Ser622IlefsTer9)	NC_000010.10:g.55892690_55892691dup	Novel	pathogenic	chr10	55892687	55892687	-	TA	NA	NA	NA	NA	NA
2016102409	male	RP	X-linked	RP2	Hemizygous	E4	NM_006915.2:c.947dup	NP_008846.2:p.(Asn316LysfsTer13)	NC_000023.10:g.46737003dup	Novel	pathogenic	chrX	46737000	46737000	-	A	NA	NA	NA	NA	NA
