# Supplementary material for: Application of Whole Exome and Targeted Panel Sequencing in the Clinical Molecular Diagnosis of 319 Chinese Families with Inherited Retinal Dystrophy and Comparison Study
Source: Genes (Basel). 2018 Jul 19;9(7):360. doi: 10.3390/genes9070360 (PMC6071067; doi:10.3390/genes9070360)
Supplement: Supplementary file 1 [file genes-09-00360-s001.zip › TableS3.xlsx]

## Sheet: Sheet1
Table S3. Clinical data and pathogenic mutations are listed for 9 probands with RPGR
ORF15 mutations.
Family ID	Gender	Initial Diagnosis	Inheritance	Gene	Genotype	Exon Number	HGVS_transcript_variant	HGVS_predicted_protein_consequence	HGVS_genomic_variant	Reference	Classification	Chr	Start	End	Ref	Alt	ExAC_ALL	ExAC_EAS	gnomAD_exome_ALL	gnomAD_exome_EAS	PopFreqMax
2016121918	male	RP?	X-linked	RPGR	Hemizygous	ORF15	NM_001034853.1:c.3092del	NP_001030025.1:p.(Glu1031GlyfsTer58)	NC_000023.10:g.38145160del	Bader I et al., 2003	pathogenic	chrX	38145160	38145160	T	-	NA	NA	NA	NA	NA
2017010920	male	CORD-II	X-linked	RPGR	Hemizygous	ORF15	NM_001034853.1:c.2405_2406del	NP_001030025.1:p.(Glu802GlyfsTer32)	NC_000023.10:g.38145848_38145849del	Novel	pathogenic	chrX	38145848	38145849	CT	-	NA	NA	NA	NA	NA
2016060105	male	RP?	X-linked	RPGR	Hemizygous	ORF15	NM_001034853.1:c.2218G>T	NP_001030025.1:p.(Glu740Ter)	NC_000023.10:g.38146034C>A	Churchill JD et al., 2013	pathogenic	chrX	38146034	38146034	C	A	NA	NA	NA	NA	NA
2016060106	male	RP	X-linked	RPGR	Hemizygous	ORF15	NM_001034853.1:c.3092del	NP_001030025.1:p.(Glu1031GlyfsTer58)	NC_000023.10:g.38145160del	Bader I et al., 2003	pathogenic	chrX	38145160	38145160	T	-	NA	NA	NA	NA	NA
2016082412	male	RP	X-linked	RPGR	Hemizygous	ORF15	NM_001034853.1:c.2695G>T	NP_001030025.1:p.(Glu899Ter)	NC_000023.10:g.38145557C>A	Novel	pathogenic	chrX	38145557	38145557	C	A	NA	NA	NA	NA	NA
2016090709	male	RP?	X-linked	RPGR	Hemizygous	ORF15	NM_001034853.1:c.2405_2406del	NP_001030025.1:p.(Glu802GlyfsTer32)	NC_000023.10:g.38145848_38145849del	Vervoort R et al., 2005	pathogenic	chrX	38145846	38145847	CT	-	NA	NA	NA	NA	NA
2016111404	male	RP?	X-linked	RPGR	Hemizygous	ORF15	NM_001034853.1:c.1754-3C>G	NP_001030025.1:p.?	NC_000023.10:g.38146501G>C	Novel	likely pathogenic	chrX	38146501	38146501	G	C	NA	NA	NA	NA	NA
2016111411	male	LCA	X-linked	RPGR	Hemizygous	ORF15	NM_001034853.1:c.2964_2965del	NP_001030025.1:p.(Glu989GlyfsTer89)	NC_000023.10:g.38145289_38145290del	Novel	pathogenic	chrX	38145289	38145290	CC	-	NA	NA	NA	NA	NA
2016092104	male	RP	X-linked	RPGR	Hemizygous	ORF15	NM_001034853.1:c.2236_2237del	NP_001030025.1:p.(Glu746ArgfsTer23)	NC_000023.10:g.38146018_38146019del	Vervoort R et al., 2000	pathogenic	chrX	38146015	38146016	TC	-	NA	NA	NA	NA	NA
