# Supplementary material for: Application of Whole Exome and Targeted Panel Sequencing in the Clinical Molecular Diagnosis of 319 Chinese Families with Inherited Retinal Dystrophy and Comparison Study
Source: Genes (Basel). 2018 Jul 19;9(7):360. doi: 10.3390/genes9070360 (PMC6071067; doi:10.3390/genes9070360)
Supplement: Supplementary file 1 [file genes-09-00360-s001.zip › TableS4.xlsx]

## Sheet: Sheet1
Table S4. Mutations identified in the present study
Gene	Inheritance	Exon Number	HGVS_transcript_variant	HGVS_predicted_protein_consequence	HGVS_genomic_variant	Reference	Heterozygous/Hemizygous	Homozygous	Allele Count
ABCA4	AR	E8	NM_000350.2:c.1035T>G	NP_000341.2:p.(Tyr345Ter)	NC_000001.10:g.94546098A>C	Novel	1	0	1
ABCA4	AR	E12	NM_000350.2:c.1561del	NP_000341.2:p.(Val521SerfsTer47)	NC_000001.10:g.94528868del	Xin W et al., 2015	1	0	1
ABCA4	AR	E13	NM_000350.2:c.1933G>A	NP_000341.2:p.(Asp645Asn)	NC_000001.10:g.94528137C>T	Lewis RA et al., 1999	1	0	1
ABCA4	AR	E16	NM_000350.2:c.2424C>G	NP_000341.2:p.(Tyr808Ter)	NC_000001.10:g.94520830G>C	Zhou Y et al., 2014	1	0	1
ABCA4	AR	E20	NM_000350.2:c.2947A>G	NP_000341.2:p.(Thr983Ala)	NC_000001.10:g.94510272T>C	Ernest PJ et al., 2009	1	0	1
ABCA4	AR	E23	NM_000350.2:c.3352C>T	NP_000341.2:p.(His1118Tyr)	NC_000001.10:g.94506935G>A	Novel	1	0	1
ABCA4	AR	E33	NM_000350.2:c.4773+5G>A	NP_000341.2:p.?	NC_000001.10:g.94487397C>T	Duno M et al., 2012	1	0	1
ABCA4	AR	E36	NM_000350.2:c.5196+1G>A	NP_000341.2:p.?	NC_000001.10:g.94485137C>T	Allikmets R et al., 1997	1	0	1
ABCA4	AR	E39	NM_000350.2:c.5512C>T	NP_000341.2:p.(His1838Tyr)	NC_000001.10:g.94476890G>A	Lewis RA et al., 1999	0	1	2
ABCA4	AR	E44	NM_000350.2:c.6050G>A	NP_000341.2:p.(Cys2017Tyr)	NC_000001.10:g.94471094C>T	Jiang F et al., 2016	1	0	1
ABCA4	AR	E48	NM_000350.2:c.6563T>C	NP_000341.2:p.(Phe2188Ser)	NC_000001.10:g.94463583A>G	Fukui T et al., 2002	1	0	1
ADAM9	AR	E4	NM_003816.2:c.290dup	NP_003807.1:p.(Tyr97Ter)	NC_000008.10:g.38871519dup	Novel	1	0	1
ADAM9	AR	E11	NM_003816.2:c.1121C>G	NP_003807.1:p.(Ser374Ter)	NC_000008.10:g.38884320C>G	Novel	1	0	1
ADGRV1	AR	E7	NM_032119.3:c.929G>A	NP_115495.3:p.(Gly310Glu)	NC_000005.9:g.89923284G>A	Jiang L et al., 2015	1	0	1
ADGRV1	AR	E88	NM_032119.3:c.18601A>C	NP_115495.3:p.(Asn6201His)	NC_000005.9:g.90446015A>C	Novel	1	0	1
AIPL1	AR	E3	NM_014336.4:c.421C>T	NP_055151.3:p.(Gln141Ter)	NC_000017.10:g.6331682G>A	Yucel-Yilmaz D et al., 2014	0	1	2
ALMS1	AR	E10	NM_015120.4:c.9154_9155delCT	NP_055935.4:p.(Cys3053SerfsTer9)	NC_000002.11:g.73718237_73718238delCT	Novel	1	0	1
ALMS1	AR	E16	NM_015120.4:c.10825C>T	NP_055935.4:p.(Arg3609Ter)	NC_000002.11:g.73799826C>T	Marshall JD et al., 2007	1	0	1
BBS10	AR	E2	NM_024685.3:c.378G>A	NP_078961.3:p.(Trp126Ter)	NC_000012.11:g.76741387C>T	Novel	1	0	1
BBS10	AR	E2	NM_024685.3:c.1063C>T	NP_078961.3:p.(Gln355Ter)	NC_000012.11:g.76740702G>A	Novel	1	0	1
BBS7	AR	E4	NM_176824.2:c.288_289del	NP_789794.1:p.(Gly97LysfsTer7)	NC_000004.11:g.122782713_122782714del	Novel	1	0	1
BBS7	AR	E10	NM_176824.2:c.1002del	NP_789794.1:p.(Asn335IlefsTer47)	NC_000004.11:g.122768595del	Chen X et al., 2013	1	0	1
BEST1	AR	E4	NM_004183.3:c.449G>T	NP_004174.1:p.(Arg150Leu)	NC_000011.9:g.61723391G>T	Novel	1	0	1
BEST1	AR	E7	NM_004183.3:c.830C>T	NP_004174.1:p.(Thr277Met)	NC_000011.9:g.61725733C>T	Zaneveld J et al., 2015	1	0	1
C21orf2	AR	E3	NM_004928.2:c.137C>T	NP_004919.1:p.(Thr46Met)	NC_000021.8:g.45755647G>A	Novel	1	0	1
C21orf2	AR	E4	NM_004928.2:c.144-6_159del	NP_004919.1:p.?	NC_000021.8:g.45753135_45753156del	Novel	1	0	1
C2orf71	AR	E2	NM_001029883.2:c.898del	NP_001025054.1:p.(Leu300SerfsTer12)	NC_000002.11:g.29296231del	Novel	0	1	2
C8orf37	AR	E2	NM_177965.3:c.172A>T	NP_808880.1:p.(Lys58Ter)	NC_000008.10:g.96275986T>A	Novel	1	0	1
C8orf37	AR	E6	NM_177965.3:c.529C>T	NP_808880.1:p.(Arg177Trp)	NC_000008.10:g.96259940G>A	Estrada-Cuzcano A et al., 2012	1	0	1
CDHR1	AR	E11	NM_033100.3:c.1041del	NP_149091.1:p.(Asn347LysfsTer21)	NC_000010.10:g.85968007del	Novel	1	0	1
CDHR1	AR	E13	NM_033100.3:c.1485+1G>A	NP_149091.1:p.?	NC_000010.10:g.85970922G>A	Novel	1	0	1
CERKL	AR	E13	NM_001030311.2:c.1467_1470dup	NP_001025482.1:p.(Thr491LeufsTer4)	NC_000002.11:g.182403967_182403970dup	Novel	0	1	2
CHM	X-linked	E5	NM_000390.3:c.315-1G>C	NP_000381.1:p.?	NC_000023.10:g.85219058C>G	Novel	1	0	1
CNGA1	AR	E6	NM_000087.3:c.265del	NP_000078.2:p.(Leu89PhefsTer4)	NC_000004.11:g.47951884del	Chen X et al., 2013	0	1	2
CRB1	AR	E2	NM_201253.2:c.139del	NP_957705.1:p.(Asp47IlefsTer24)	NC_000001.10:g.197297620del	Novel	1	0	1
CRB1	AR	E6	NM_201253.2:c.1724C>T	NP_957705.1:p.(Ala575Val)	NC_000001.10:g.197390682C>T	Novel	1	0	1
CRB1	AR	E6	NM_201253.2:c.1841G>A	NP_957705.1:p.(Gly614Asp)	NC_000001.10:g.197390799G>A	Novel	0	1	2
CRB1	AR	E6	NM_201253.2:c.2056C>T	NP_957705.1:p.(Arg686Cys)	NC_000001.10:g.197391014C>T	Novel	1	0	1
CRB1	AR	E7	NM_201253.2:c.2541_2542del	NP_957705.1:p.(Phe848GlnfsTer60)	NC_000001.10:g.197396996_197396997del	Novel	1	0	1
CRB1	AR	E8	NM_201253.2:c.2714G>A	NP_957705.1:p.(Arg905Gln)	NC_000001.10:g.197398616G>A	den Hollander AI et al., 2004	1	0	1
CRB1	AR	E8	NM_201253.2:c.2809G>A	NP_957705.1:p.(Ala937Thr)	NC_000001.10:g.197398711G>A	Xu Y et al., 2014	1	0	1
CRB1	AR	E9	NM_201253.2:c.2981_2982del	NP_957705.1:p.(Lys994ArgfsTer3)	NC_000001.10:g.197403974_197403975del	Novel	1	0	1
CRB1	AR	E10	NM_201253.2:c.3862G>A	NP_957705.1:p.(Gly1288Ser)	NC_000001.10:g.197407789G>A	Rong W et al., 2014	1	0	1
CRB1	AR	E12	NM_201253.2:c.4207G>C	NP_957705.1:p.(Glu1403Gln)	NC_000001.10:g.197446995G>C	Yang L et al., 2014	0	1	2
CRX	AD	E4	NM_000554.5:c.509del	NP_000545.1:p.(Pro170LeufsTer17)	NC_000019.9:g.48342833del	Novel	1	0	1
CYP4V2	AR	E1	NM_207352.3:c.214+1G>T	NP_997235.3:p.?	NC_000004.11:g.187113192G>T	Novel	1	0	1
CYP4V2	AR	E2	NM_207352.3:c.215-2A>G	NP_997235.3:p.?	NC_000004.11:g.187115652A>G	Xiao X et al., 2011	0	1	2
CYP4V2	AR	E7	NM_207352.3:c.802-8_810delinsGC	NP_997235.3:p.?	NC_000004.11:g.187122303_187122319delinsGC	Wada Y et al., 2005	1	3	7
CYP4V2	AR	E9	NM_207352.3:c.1091-2A>G	NP_997235.3:p.?	NC_000004.11:g.187130017A>G	Li A et al., 2004	2	1	4
EYS	AR	E14	NM_001142800.1:c.2259+1G>A	NP_001136272.1:p.?	NC_000006.11:g.65707474C>T	Bonilha VL et al., 2015	2	0	2
EYS	AR	E26	NM_001142800.1:c.5254dup	NP_001136272.1:p.(Ile1752AsnfsTer18)	NC_000006.11:g.65300508dup	Novel	0	1	2
EYS	AR	E31	NM_001142800.1:c.6416G>A	NP_001136272.1:p.(Cys2139Tyr)	NC_000006.11:g.64940493C>T	Audo I et al., 2010	0	1	2
EYS	AR	E32	NM_001142800.1:c.6545del	NP_001136272.1:p.(Asn2182ThrfsTer3)	NC_000006.11:g.64791777del	Novel	1	0	1
EYS	AR	E43	NM_001142800.1:c.8326del	NP_001136272.1:p.(Val2776Ter)	NC_000006.11:g.64431601del	Novel	1	0	1
FRMD7	X-linked	E12	NM_194277.2:c.1266_1269dup	NP_919253.1:p.(Asn424LeufsTer2)	NC_000023.10:g.131212777_131212780dup	Novel	1	0	1
GUCY2D	AR	E2	NM_000180.3:c.244_250dup	NP_000171.1:p.(Leu84ArgfsTer237)	NC_000017.10:g.7906609_7906615dup	Novel	1	0	1
GUCY2D	AR	E4	NM_000180.3:c.1027-2A>G	NP_000171.1:p.?	NC_000017.10:g.7909679A>G	Novel	1	0	1
IMPDH1	AD	E10	NM_000883.3:c.931G>A	NP_000874.2:p.(Asp311Asn)	NC_000007.13:g.128038611C>T	Bowne SJ et al., 2002	1	0	1
IMPDH1	AD	E10	NM_000883.3:c.984G>C	NP_000874.2:p.(Gln328His)	NC_000007.13:g.128038558C>G	Novel	1	0	1
LCA5	AR	E2	NM_181714.3:c.1819_1820del	NP_859065.2:p.(Gln607ValfsTer7)	NC_000006.11:g.80196996_80196997del	Novel	0	1	2
MERTK	AR	E2	NM_006343.2:c.296_297del	NP_006334.2:p.(Thr99SerfsTer8)	NC_000002.11:g.112686931_112686932del	Novel	0	1	2
MYO7A	AR	E9	NM_000260.3:c.1003+1G>A	NP_000251.3:p.?	NC_000011.9:g.76869477G>A	Novel	1	0	1
MYO7A	AR	E29	NM_000260.3:c.3696_3706del	NP_000251.3:p.(Arg1232SerfsTer72)	NC_000011.9:g.76901130_76901140del	Jiang L et al., 2015	1	0	1
MYO7A	AR	E31	NM_000260.3:c.4108C>T	NP_000251.3:p.(Gln1370Ter)	NC_000011.9:g.76903279C>T	Novel	1	0	1
MYO7A	AR	E40	NM_000260.3:c.5581C>T	NP_000251.3:p.(Arg1861Ter)	NC_000011.9:g.76916607C>T	Adato A et al., 1997	1	0	1
NMNAT1	AR	E3	NM_022787.3:c.179_180insA	NP_073624.2:p.(Ile61HisfsTer18)	NC_000001.10:g.10035713_10035714insA	Novel	1	0	1
NMNAT1	AR	E5	NM_022787.3:c.710G>A	NP_073624.2:p.(Arg237His)	NC_000001.10:g.10042629G>A	Novel	1	0	1
NYX	X-linked	E2	NM_022567.2:c.1037G>A	NP_072089.1:p.(Trp346Ter)	NC_000023.10:g.41333743G>A	Novel	1	0	1
PCDH15	AR	E15	NM_033056.3:c.1863_1864dup	NP_149045.3:p.(Ser622IlefsTer9)	NC_000010.10:g.55892690_55892691dup	Novel	0	1	2
PDE6A	AR	E1	NM_000440.2:c.285C>A	NP_000431.2:p.(Ser95Arg)	NC_000005.9:g.149323952G>T	Novel	1	0	1
PDE6A	AR	E10	NM_000440.2:c.1407+1G>C	NP_000431.2:p.?	NC_000005.9:g.149277925C>G	Novel	1	0	1
PDE6A	AR	E13	NM_000440.2:c.1651A>G	NP_000431.2:p.(Lys551Glu)	NC_000005.9:g.149274823T>C	Novel	1	0	1
PDE6A	AR	E13	NM_000440.2:c.1685G>A	NP_000431.2:p.(Arg562Gln)	NC_000005.9:g.149274789C>T	Novel	1	0	1
PDE6A	AR	E16	NM_000440.2:c.1957C>T	NP_000431.2:p.(Arg653Ter)	NC_000005.9:g.149264112G>A	Perez-Carro R et al., 2016	1	0	1
PDE6A	AR	E20	NM_000440.2:c.2275-2A>G	NP_000431.2:p.?	NC_000005.9:g.149245818T>C	Novel	1	0	1
PDE6B	AR	E1	NM_000283.3:c.3dup	NP_000274.2:p.(Met1?)	NC_000004.11:g.619418dup	Novel	0	1	2
PDE6B	AR	E1	NM_000283.3:c.220C>T	NP_000274.2:p.(Arg74Cys)	NC_000004.11:g.619635C>T	van Huet RA et al., 2015	2	0	2
PDE6B	AR	E1	NM_000283.3:c.385G>A	NP_000274.2:p.(Glu129Lys)	NC_000004.11:g.619800G>A	Novel	1	0	1
PDE6B	AR	E3	NM_000283.3:c.698C>T	NP_000274.2:p.(Thr233Met)	NC_000004.11:g.629745C>T	Novel	1	0	1
PDE6B	AR	E11	NM_000283.3:c.1467+1G>C	NP_000274.2:p.?	NC_000004.11:g.652807G>C	Fu Q et al., 2013	1	0	1
PDE6B	AR	E12	NM_000283.3:c.1613_1614+1del	NP_000274.2:p.(Glu538del)	NC_000004.11:g.654401_654403del	Novel	1	0	1
PDE6B	AR	E19	NM_000283.3:c.2204T>C	NP_000274.2:p.(Leu735Pro)	NC_000004.11:g.659054T>C	Novel	0	1	2
PROM1	AD	E12	NM_006017.2:c.1414C>T	NP_006008.1:p.(Arg472Ter)	NC_000004.11:g.16008201G>A	Novel	1	0	1
PRPF31	AD	E4	NM_015629.3:c.320T>C	NP_056444.3:p.(Leu107Pro)	NC_000019.9:g.54625320T>C	Novel	1	0	1
PRPF31	AD	E8	NM_015629.3:c.785T>C	NP_056444.3:p.(Phe262Ser)	NC_000019.9:g.54627965T>C	Novel	1	0	1
PRPF31	AD	E10	NM_015629.3:c.1060C>T	NP_056444.3:p.(Arg354Ter)	NC_000019.9:g.54631562C>T	Sullivan LS et al., 2013	1	0	1
PRPF8	AD	E43	NM_006445.3:c.6928A>G	NP_006436.3:p.(Arg2310Gly)	NC_000017.10:g.1554176T>C	McKie AB et al., 2001	1	0	1
PRPF8	AD	E43	NM_006445.3:c.6938A>G	NP_006436.3:p.(His2313Arg)	NC_000017.10:g.1554166T>C	Novel	1	0	1
PRPH2	AD	E2	NM_000322.4:c.658C>T	NP_000313.2:p.(Arg220Trp)	NC_000006.11:g.42672273G>A	Becirovic E et al., 2016	1	0	1
RDH12	AR	E4	NM_152443.2:c.146C>T	NP_689656.2:p.(Thr49Met)	NC_000014.8:g.68191267C>T	Lee SA et al., 2010	1	0	1
RDH12	AR	E6	NM_152443.2:c.437T>A	NP_689656.2:p.(Val146Asp)	NC_000014.8:g.68192861T>A	Fu Q et al., 2013	0	2	4
RDH12	AR	E7	NM_152443.2:c.505C>T	NP_689656.2:p.(Arg169Trp)	NC_000014.8:g.68193754C>T	Mackay DS et al., 2011	1	0	1
RHO	AD	E1	NM_000539.3:c.36del	NP_000530.1:p.(Phe13SerfsTer35)	NC_000003.11:g.129247612del	Novel	1	0	1
RHO	AD	E1	NM_000539.3:c.50C>T	NP_000530.1:p.(Thr17Met)	NC_000003.11:g.129247626C>T	Sheffield VC et al., 1991	1	0	1
RHO	AD	E2	NM_000539.3:c.403C>T	NP_000530.1:p.(Arg135Trp)	NC_000003.11:g.129249760C>T	Bunge S et al., 1993	1	0	1
RHO	AD	E4	NM_000539.3:c.851G>A	NP_000530.1:p.(Gly284Asp)	NC_000003.11:g.129251530G>A	Novel	1	0	1
RHO	AD	E5	NM_000539.3:c.1034T>C	NP_000530.1:p.(Val345Ala)	NC_000003.11:g.129252548T>C	Novel	1	0	1
RHO	AD	E5	NM_000539.3:c.1040C>T	NP_000530.1:p.(Pro347Leu)	NC_000003.11:g.129252554C>T	Dryja TP et al., 1990	1	0	1
RLBP1	AR	E4	NM_000326.4:c.34_44del	NP_000317.1:p.(Pro12ThrfsTer36)	NC_000015.9:g.89761894_89761904del	Novel	1	0	1
RLBP1	AR	E9	NM_000326.4:c.811del	NP_000317.1:p.(Asp271MetfsTer58)	NC_000015.9:g.89753662del	Novel	1	0	1
RP1	AR	E2	NM_006269.1:c.426dup	NP_006260.1:p.(Ala143SerfsTer86)	NC_000008.10:g.55533952dup	Xu Y et al., 2014	0	1	2
RP1	AD	E4	NM_006269.1:c.2029C>T	NP_006260.1:p.(Arg677Ter)	NC_000008.10:g.55538471C>T	Pierce EA et al., 1999	1	0	1
RP1	AR	E12	NM_006269.1:c.4743dup	NP_006260.1:p.(Cys1582MetfsTer9)	NC_000008.10:g.55541185dup	Novel	1	0	1
RP1	AR	E12	NM_006269.1:c.5531dup	NP_006260.1:p.(Glu1845GlyfsTer13)	NC_000008.10:g.55541973dup	Novel	1	0	1
RP2	X-linked	E4	NM_006915.2:c.947dup	NP_008846.2:p.(Asn316LysfsTer13)	NC_000023.10:g.46737003dup	Novel	1	0	1
RPE65	AR	E3	NM_000329.2:c.188G>A	NP_000320.1:p.(Gly63Glu)	NC_000001.10:g.68912450C>T	Novel	0	1	2
RPGR	X-linked	E2	NM_000328.2:c.29-2A>T	NP_000319.1:p.?	NC_000023.10:g.38182779T>A	Novel	1	0	1
RPGR	X-linked	E4	NM_000328.2:c.310+3A>G	NP_000319.1:p.?	NC_000023.10:g.38180277T>C	Buraczynska M et al., 1997	1	0	1
RPGR	X-linked	E5	NM_000328.2:c.373G>T	NP_000319.1:p.(Glu125Ter)	NC_000023.10:g.38178178C>A	Novel	1	0	1
RPGR	X-linked	E13	NM_000328.2:c.1399C>T	NP_000319.1:p.(Gln467Ter)	NC_000023.10:g.38156552G>A	Rosenberg T et al., 1999	1	0	1
RPGR	X-linked	ORF15	NM_000328.2:c.1754-3C>G	NP_000319.1:p.?	NC_000023.10:g.38146501G>C	Novel	1	0	1
RPGR	X-linked	ORF15	NM_001034853.1:c.2218G>T	NP_001030025.1:p.(Glu740Ter)	NC_000023.10:g.38146034C>A	Churchill JD et al., 2013	1	0	1
RPGR	X-linked	ORF15	NM_001034853.1:c.2236_2237del	NP_001030025.1:p.(Glu746ArgfsTer23)	NC_000023.10:g.38146018_38146019del	Vervoort R et al., 2000	1	0	1
RPGR	X-linked	ORF15	NM_001034853.1:c.2405_2406del	NP_001030025.1:p.(Glu802GlyfsTer32)	NC_000023.10:g.38145848_38145849del	Novel	1	0	1
RPGR	X-linked	ORF15	NM_001034853.1:c.2405_2406del	NP_001030025.1:p.(Glu802GlyfsTer32)	NC_000023.10:g.38145848_38145849del	Vervoort R et al., 2005	1	0	1
RPGR	X-linked	ORF15	NM_001034853.1:c.2695G>T	NP_001030025.1:p.(Glu899Ter)	NC_000023.10:g.38145557C>A	Novel	1	0	1
RPGR	X-linked	ORF15	NM_001034853.1:c.2964_2965del	NP_001030025.1:p.(Glu989GlyfsTer89)	NC_000023.10:g.38145289_38145290del	Novel	1	0	1
RPGR	X-linked	ORF15	NM_001034853.1:c.3092del	NP_001030025.1:p.(Glu1031GlyfsTer58)	NC_000023.10:g.38145160del	Bader I et al., 2003	2	0	2
SNRNP200	AD	E22	NM_014014.4:c.2941-2A>G	NP_054733.2:p.?	NC_000002.11:g.96955119T>C	Novel	1	0	1
SPATA7	AR	E2	NM_018418.4:c.20_23delTCAG	NP_060888.2:p.(Val7GlufsTer19)	NC_000014.8:g.88857725_88857728delTCAG	Novel	1	0	1
SPATA7	AR	E5	NM_018418.4:c.253C>T	NP_060888.2:p.(Arg85Ter)	NC_000014.8:g.88883069C>T	Mackay DS et al., 2011	1	0	1
TRPM1	AR	E5	NM_002420.5:c.428G>A	NP_002411.3:p.(Gly143Asp)	NC_000015.9:g.31359390C>T	Novel	1	0	1
TRPM1	AR	E8	NM_002420.5:c.910G>T	NP_002411.3:p.(Glu304Ter)	NC_000015.9:g.31354895C>A	Novel	1	0	1
TULP1	AR	E9	NM_003322.5:c.823_826del	NP_003313.3:p.(Lys275ArgfsTer34)	NC_000006.11:g.35474055_35474058del	Novel	1	0	1
TULP1	AR	E14	NM_003322.5:c.1459T>C	NP_003313.3:p.(Ser487Pro)	NC_000006.11:g.35467794A>G	Novel	1	0	1
USH2A	AR	E2	NM_206933.2:c.80C>A	NP_996816.2:p.(Ser27Ter)	NC_000001.10:g.216595599G>T	Novel	1	0	1
USH2A	AR	E2	NM_206933.2:c.99_100insT	NP_996816.2:p.(Arg34SerfsTer41)	NC_000001.10:g.216595579_216595580insA	Dai H et al., 2008	1	0	1
USH2A	AR	E3	NM_206933.2:c.538T>C	NP_996816.2:p.(Ser180Pro)	NC_000001.10:g.216591969A>G	Nakanishi H et al., 2009	1	0	1
USH2A	AR	E8	NM_206933.2:c.1397G>T	NP_996816.2:p.(Gly466Val)	NC_000001.10:g.216496969C>A	Xu Y et al., 2014	1	0	1
USH2A	AR	E11	NM_206933.2:c.1876C>T	NP_996816.2:p.(Arg626Ter)	NC_000001.10:g.216462717G>A	Weston MD et al., 2000	1	0	1
USH2A	AR	E13	NM_206933.2:c.2802T>G	NP_996816.2:p.(Cys934Trp)	NC_000001.10:g.216419934A>C	Xu W et al., 2011	7	4	15
USH2A	AR	E17	NM_206933.2:c.3788G>A	NP_996816.2:p.(Trp1263Ter)	NC_000001.10:g.216372992C>T	Xu W et al., 2011	1	0	1
USH2A	AR	E18	NM_206933.2:c.3862G>T	NP_996816.2:p.(Glu1288Ter)	NC_000001.10:g.216371876C>A	Novel	1	0	1
USH2A	AR	E21	NM_206933.2:c.4616C>T	NP_996816.2:p.(Thr1539Ile)	NC_000001.10:g.216348605G>A	Novel	1	0	1
USH2A	AR	E21	NM_206933.2:c.4627+1G>A	NP_996816.2:p.?	NC_000001.10:g.216348593C>T	Novel	1	0	1
USH2A	AR	E22	NM_206933.2:c.4685C>A	NP_996816.2:p.(Ser1562Ter)	NC_000001.10:g.216270498G>T	Novel	1	0	1
USH2A	AR	E22	NM_206933.2:c.4732C>T	NP_996816.2:p.(Arg1578Cys)	NC_000001.10:g.216270451G>A	Le Quesne SP et al., 2012	1	0	1
USH2A	AR	E24	NM_206933.2:c.4948G>A	NP_996816.2:p.(Gly1650Arg)	NC_000001.10:g.216260100C>T	Novel	1	0	1
USH2A	AR	E24	NM_206933.2:c.4957C>T	NP_996816.2:p.(Arg1653Ter)	NC_000001.10:g.216260091G>A	Dreyer B et al., 2008	1	0	1
USH2A	AR	E27	NM_206933.2:c.5329C>T	NP_996816.2:p.(Arg1777Trp)	NC_000001.10:g.216251674G>A	Nakanishi H et al., 2011	1	0	1
USH2A	AR	E28	NM_206933.2:c.5608C>T	NP_996816.2:p.(Arg1870Trp)	NC_000001.10:g.216246607G>A	Miyagawa M et al., 2013	1	0	1
USH2A	AR	E31	NM_206933.2:c.6083A>G	NP_996816.2:p.(Tyr2028Cys)	NC_000001.10:g.216221956T>C	Novel	1	0	1
USH2A	AR	E33	NM_206933.2:c.6383G>A	NP_996816.2:p.(Cys2128Tyr)	NC_000001.10:g.216173847C>T	McGee TL et al., 2010	1	0	1
USH2A	AR	E37	NM_206933.2:c.7036_7057del	NP_996816.2:p.(His2346PhefsTer7)	NC_000001.10:g.216138722_216138743del	Novel	1	0	1
USH2A	AR	E41	NM_206933.2:c.8167C>T	NP_996816.2:p.(Arg2723Ter)	NC_000001.10:g.216061824G>A	Jaijo T et al., 2010	1	0	1
USH2A	AR	E42	NM_206933.2:c.8284C>G	NP_996816.2:p.(Pro2762Ala)	NC_000001.10:g.216052380G>C	Chen X et al., 2014	1	0	1
USH2A	AR	E43	NM_206933.2:c.8559-2A>G	NP_996816.2:p.?	NC_000001.10:g.216051224T>C	Dai H et al., 2008	7	5	17
USH2A	AR	E51	NM_206933.2:c.10049dup	NP_996816.2:p.(Asn3351GlufsTer2)	NC_000001.10:g.215963538dup	Novel	1	0	1
USH2A	AR	E54	NM_206933.2:c.10612C>T	NP_996816.2:p.(Arg3538Ter)	NC_000001.10:g.215955512G>A	Jiang L et al., 2015	1	0	1
USH2A	AR	E55	NM_206933.2:c.10830G>C	NP_996816.2:p.(Trp3610Cys)	NC_000001.10:g.215953294C>G	Novel	1	0	1
USH2A	AR	E55	NM_206933.2:c.10859T>C	NP_996816.2:p.(Ile3620Thr)	NC_000001.10:g.215953265A>G	Katagiri S et al., 2014	1	0	1
USH2A	AR	E57	NM_206933.2:c.11156G>A	NP_996816.2:p.(Arg3719His)	NC_000001.10:g.215933077C>T	Chen X et al., 2014	1	0	1
USH2A	AR	E59	NM_206933.2:c.11533C>T	NP_996816.2:p.(Gln3845Ter)	NC_000001.10:g.215916534G>A	McGee TL et al., 2010	1	0	1
USH2A	AR	E61	NM_206933.2:c.11754G>A	NP_996816.2:p.(Trp3918Ter)	NC_000001.10:g.215901684C>T	Baux D et al., 2014	1	0	1
USH2A	AR	E61	NM_206933.2:c.11806A>C	NP_996816.2:p.(Thr3936Pro)	NC_000001.10:g.215901632T>G	Dai H et al., 2008	1	0	1
USH2A	AR	E61	NM_206933.2:c.11865G>A	NP_996816.2:p.(Trp3955Ter)	NC_000001.10:g.215901573C>T	Novel	1	0	1
USH2A	AR	E63	NM_206933.2:c.12560G>A	NP_996816.2:p.(Arg4187His)	NC_000001.10:g.215848693C>T	Xin Y et al., 2014	1	0	1
USH2A	AR	E63	NM_206933.2:c.12580T>C	NP_996816.2:p.(Cys4194Arg)	NC_000001.10:g.215848673A>G	Lenassi E et al., 2015	2	0	2
USH2A	AR	E63	NM_206933.2:c.13010C>T	NP_996816.2:p.(Thr4337Met)	NC_000001.10:g.215848243G>A	Aller E et al., 2006	2	0	2
USH2A	AR	E64	NM_206933.2:c.13836C>A	NP_996816.2:p.(Cys4612Ter)	NC_000001.10:g.215844611G>T	Novel	1	0	1
USH2A	AR	E65	NM_206933.2:c.14222C>T	NP_996816.2:p.(Pro4741Leu)	NC_000001.10:g.215824055G>A	Novel	1	0	1
USH2A	AR	E66	NM_206933.2:c.14411G>A	NP_996816.2:p.(Gly4804Glu)	NC_000001.10:g.215822041C>T	Novel	1	0	1
USH2A	AR	E70	NM_206933.2:c.15178T>C	NP_996816.2:p.(Ser5060Pro)	NC_000001.10:g.215807920A>G	Katagiri S et al., 2014	3	0	3
